# Supplementary material
Source: MDPI journal article supplement (https://www.mdpi.com/1424-2818/5/2/263)

## Supplementary Materials

**S1 Figure A.** Distribution of sampling sites for long distance dispersers with phylogenetic breaks.

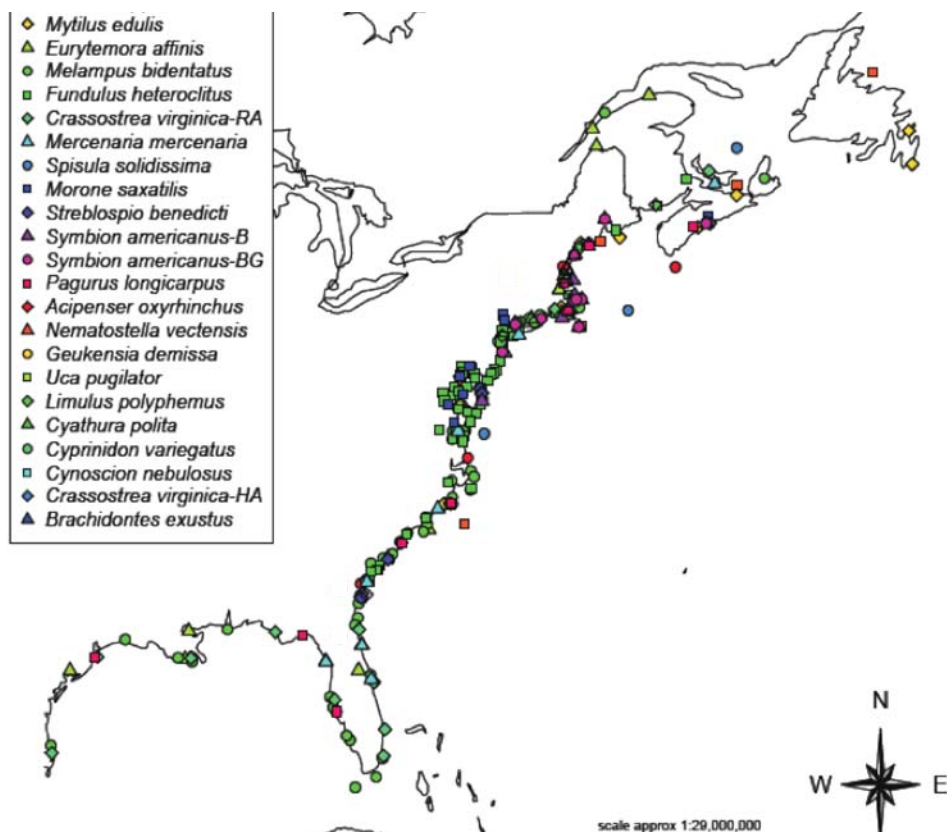

**S1 Figure B.** Distribution of sampling sites for short distance dispersers with phylogenetic breaks.

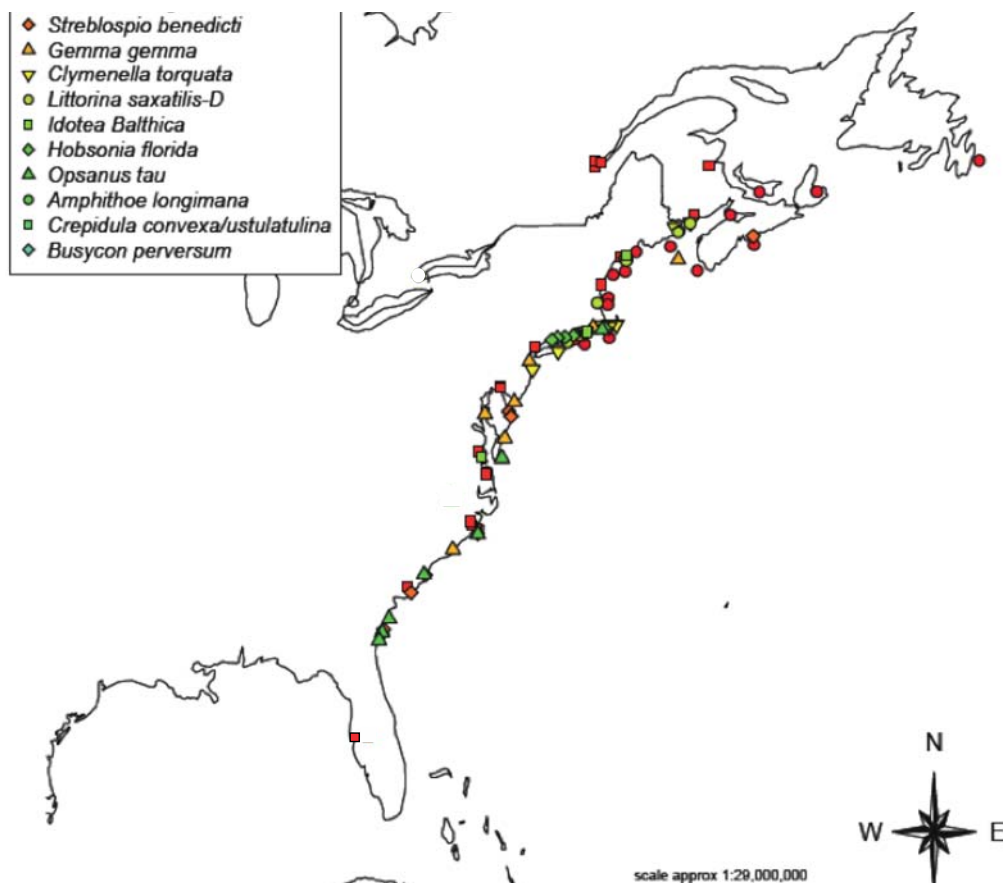

**S1 Figure C.** Distribution of sampling sites for long distance dispersers without phylogenetic breaks.

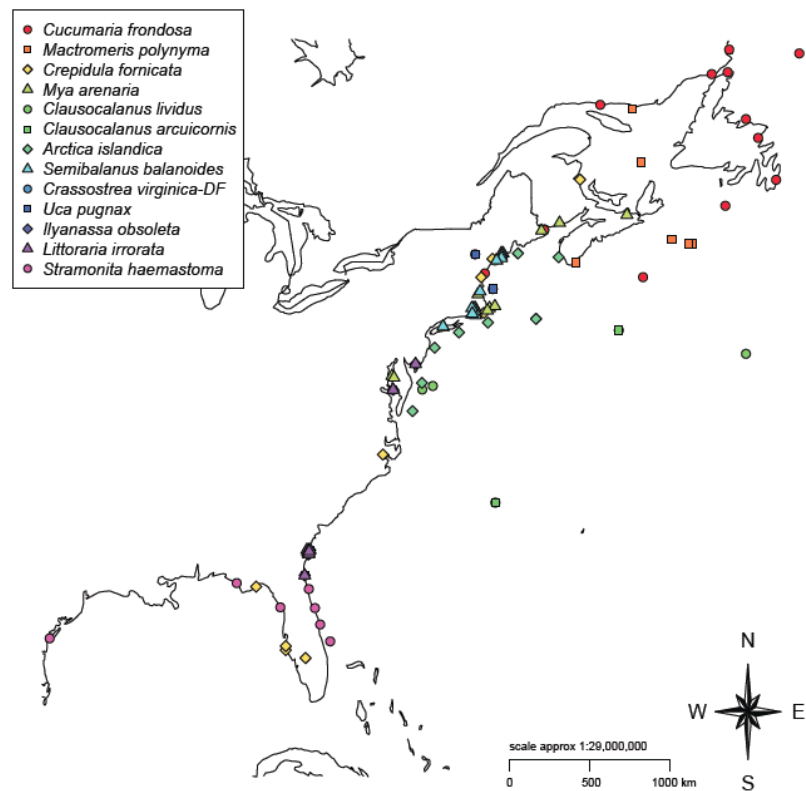

**S1 Figure D.** Distribution of sampling sites for short distance dispersers (both algae) without phylogenetic breaks.

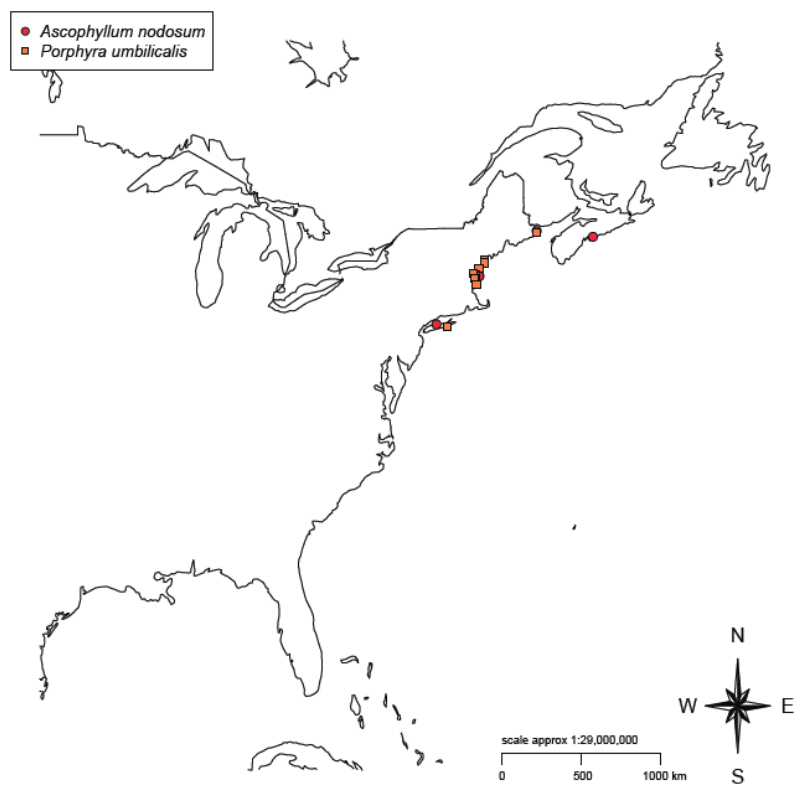

Supplement: s1 [file s1]
